# Supplementary material for: TMEM116 is required for lung cancer cell motility and metastasis through PDK1 signaling pathway
Source: PubMed Central journal article supplement (PMC8599864; doi:10.1038/s41419-021-04369-1), 2021-11-16
Supplement: 41419_2021_4369_MOESM2_ESM.pdf [file 41419_2021_4369_MOESM2_ESM.pdf]

Dear Dr. Xing,

I am writing to confirm that I give my consent for information about myself to be published in Cell Death & Disease, CDDIS-21-2663RR, "TMEM116 is required for lung cancer cell motility and metastasis through PDK1 signaling pathway".

Sincerely

Dr. Suhong Zhang

A handwritten signature in black ink that reads "Suhong Zhang". The signature is written in a cursive style with a large 'S' and 'Z'.

State Key Laboratory for Agrobiotechnology  
College of Biological Sciences  
China Agricultural University  
Beijing, P.R. China.  
Email: SZ20143020066@cau.edu.cn

Dear Dr. Xing,

I am writing to confirm that I give my consent for information about myself to be published in Cell Death & Disease, CDDIS-21-2663RR, "TMEM116 is required for lung cancer cell motility and metastasis through PDK1 signaling pathway".

Sincerely

Dr. Haiting Dai

A handwritten signature in black ink that reads "Haiting Dai". The signature is written in a cursive, flowing style.

State Key Laboratory for Agrobiotechnology  
College of Biological Sciences  
China Agricultural University  
Beijing, P.R. China.  
Email: SZ20173020178@cau.edu.cn

Dear Dr. Xing,

I am writing to confirm that I give my consent for information about myself to be published in Cell Death & Disease, CDDIS-21-2663RR, "TMEM116 is required for lung cancer cell motility and metastasis through PDK1 signaling pathway".

Sincerely

Dr. Wenya Li

A handwritten signature in black ink, appearing to read 'Wenya Li'. The signature is written in a cursive, flowing style with a small dash at the end.

State Key Laboratory for Agrobiotechnology  
College of Biological Sciences  
China Agricultural University  
Beijing, P.R. China.  
Email: b20203020120@cau.edu.cn

Dear Dr. Xing,

I am writing to confirm that I give my consent for information about myself to be published in Cell Death & Disease, CDDIS-21-2663RR, "TMEM116 is required for lung cancer cell motility and metastasis through PDK1 signaling pathway".

Sincerely

A handwritten signature in black ink that reads "Runming Wang". The signature is written in a cursive, flowing style.

Dr. Runming Wang  
State Key Laboratory for Agrobiotechnology  
College of Biological Sciences  
China Agricultural University  
Beijing, P.R. China.  
Email: wrm1990@cau.edu.cn

Dear Dr. Xing,

I am writing to confirm that I give my consent for information about myself to be published in Cell Death & Disease, CDDIS-21-2663RR, "TMEM116 is required for lung cancer cell motility and metastasis through PDK1 signaling pathway".

Sincerely

Dr. Hanyu Wu

Handwritten signature of Hanyu Wu in black ink.

State Key Laboratory for Agrobiotechnology  
College of Biological Sciences  
China Agricultural University  
Beijing, P.R. China.  
Email: wuhanyu@cau.edu.cn

# Confirmation letter from Dr. Ming Shen

锁屏 退出 | Q 邮件全文搜索

收件箱 署名同意信 x

回复 回复全部 转发 移动到 标记为 更多 删除

**署名同意信** 沈鸣 发送给 邢怡明 2021-10-20 13:03:35 发起会议

Dear Dr. Xing,

I am writing to confirm that I give my consent for information about myself to be published in Cell Death & Disease, CDDIS-21-2663RR, "TMEM116 is required for lung cancer cell motility and metastasis through PDK1 signaling pathway".

Sincerely

Shen Ming  
Translational Medicine Center,  
Chinese PLA General Hospital(301 hospital),  
No. 28 Fu Xing Road (Wukesong),  
Haidian District, Beijing 100853, China  
Office: 86-10-66936362  
Cell phone: 86-15001342876

Dear Dr. Xing,

I am writing to confirm that I give my consent for information about myself to be published in Cell Death & Disease, CDDIS-21-2663RR, "TMEM116 is required for lung cancer cell motility and metastasis through PDK1 signaling pathway".

Sincerely

Dr. Ye Hu

Handwritten signature of Ye Hu in black ink.

College of Pulmonary and Critical Care Medicine  
Chinese PLA General Hospital  
Beijing, P.R.China.

Dear Dr. Xing,

I am writing to confirm that I give my consent for information about myself to be published in Cell Death & Disease, CDDIS-21-2663RR, "TMEM116 is required for lung cancer cell motility and metastasis through PDK1 signaling pathway".

Sincerely

Prof. Lixin XIE

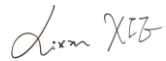A handwritten signature in black ink, appearing to read "Lixin Xie".

Head of College of Pulmonary & Critical Care Medicine  
Chinese PLA General Hospital  
Beijing  
China
